# Supplementary material
Source: PubMed Central journal article supplement (PMC2940646)
Supplement: supp_nop056_nop056supp.pdf [file supp_nop056_nop056supp.pdf]

**Supplemental Fig. s1.** Representative images showing the immunohistochemical staining of MAP and GFAP in the xenograft tumors at passage I (*arrow*). *Arrowheads* indicate the edge of tumor beyond which strong positivity of MAP in normal mouse brain and GFAP in reactive mouse astrocytes were observed.

**Supplemental Fig. s2.** Gene ontology analysis of the dysregulated signaling pathways that were present in patient tumor and xenografts (both passage I and passage III) compared to the normal pooled RNA samples.

**Supplemental Fig. 3.** Gene ontology analysis of the dysregulated pathways that were present in the xenografts (both passage I and passage III) compared to the patient tumor RNA sample.

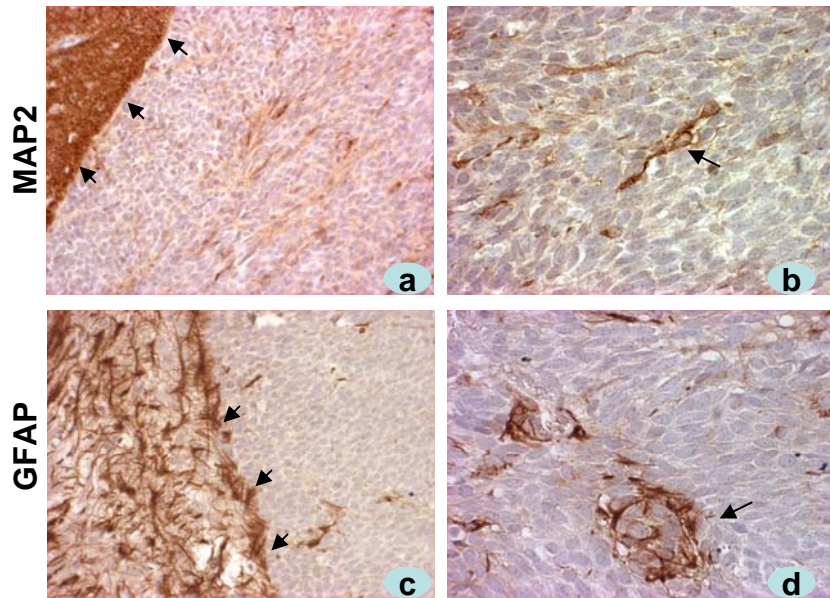

Supplemental Fig. s1

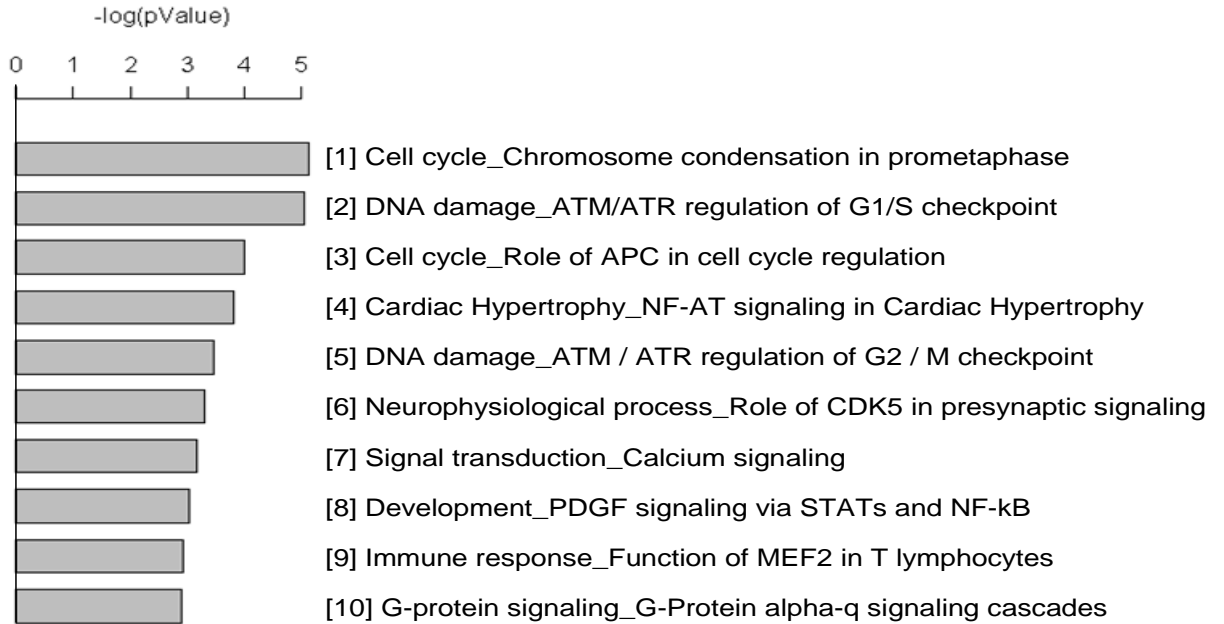

**Supplemental Fig. s2**

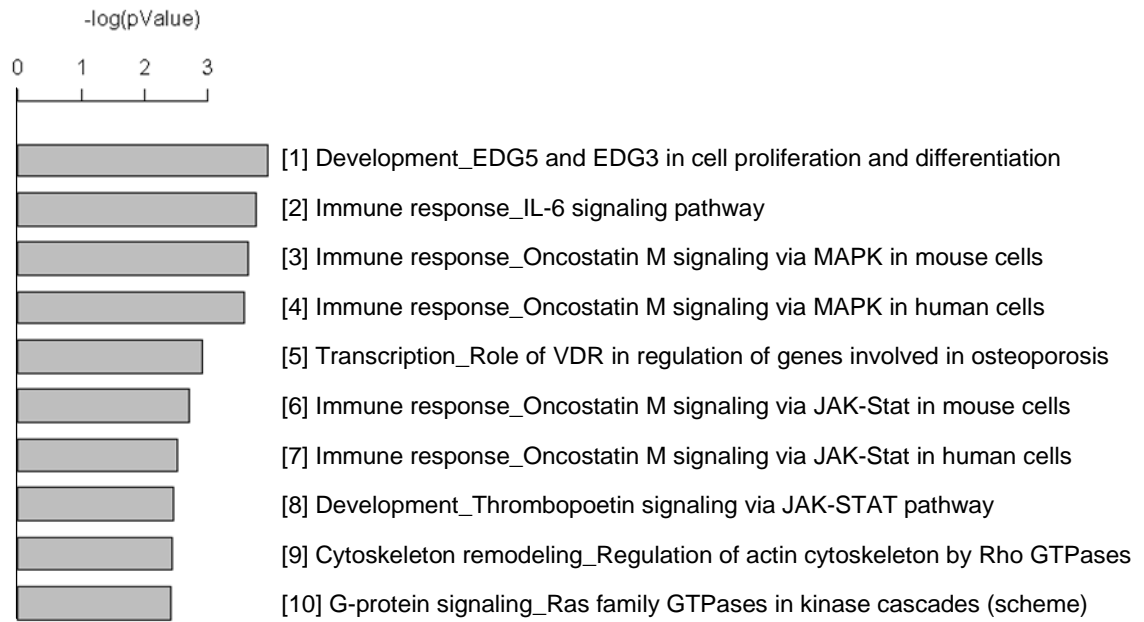

### Supplemental Fig. s3
